# Supplementary material for: Fireground Strategies & Tactics Understanding How the Private Sector Can Help Improve Fire Outcomes
Source: Frontiers journal article supplement (doi:10.3389/fgene.2022.844624), 2008-03-01
Supplement: Presentation_1.PDF [file Presentation_1.PDF]

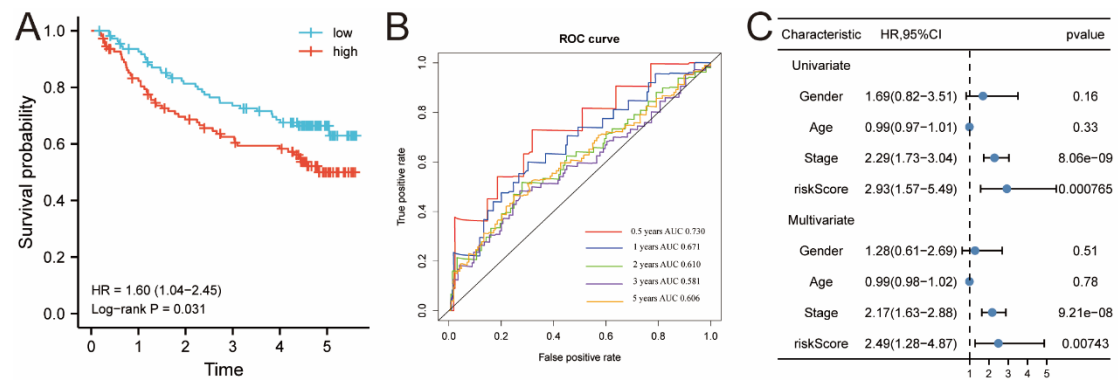

Figure S1. The predictive power of the risk model in GSE14520 cohort. A. Survival curves were plotted using the Kaplan–Meier method. B. Receiver operating characteristic curve was applied to assess the performance of the risk model. C. Univariate and multivariate Cox regression analysis were performed.
